# Supplementary material for: Facile construction of graphene-like Ni3S2 nanosheets through the hydrothermally assisted sulfurization of nickel foam and their application as self-supported electrodes for supercapacitors
Source: Royal Society of Chemistry journal article supplement (doi:10.1039/c3ra45152f), 2015-01-01
Supplement: c3ra45152f1.pdf [file c3ra45152f1.pdf]

## Electronic supplementary information

### **Facile construction of Ni<sub>3</sub>S<sub>2</sub> arrays through hydrothermal route-assisted sulfurization of nickel foam as self-supported electrodes for supercapacitors**

Ping Zhang<sup>a</sup>, Ming Zhuo<sup>b</sup>, Yuejiao Chen<sup>\*b</sup> and Qihong Li<sup>\*a</sup>

<sup>a</sup> Key Laboratory for Micro-Nano Optoelectronic Devices of Ministry of Education, State Key Laboratory for Chemo/Biosensing and Chemometrics, Hunan University, Changsha 410082, P. R. China. Fax: +86 731 88822332; Tel: +86 731 88822332;

E-mail: [liqihong2004@hotmail.com](mailto:liqihong2004@hotmail.com)

<sup>b</sup> College of electrical and information engineering, Hunan University, Changsha 410082, P. R. China.

E-mail: [cyl.strive@163.com](mailto:cyl.strive@163.com)

### **Experimental**

All the chemicals were of analytical grade and were used without further purification. Nickel foam (5 cm × 4 cm) was carefully cleaned with 2 M HCl solution in an ultrasound bath for 30 min to remove the possible surface oxide layer, and then cleaned with deionized water and absolute ethanol for 15 min each. In a typical synthesis, 2 mmol of thioacetamide (TAA) were dissolved in 40 mL of deionized water to form a homogeneous solution. Afterward, the solution and the pretreated Ni foam were transferred into a 50 mL Teflon-lined stainless-steel autoclave, which was sealed and maintained at 120 °C for 4 h. After the autoclave cooled down to room temperature, the Ni foam was taken out of solution and washed with absolute ethanol followed by deionized water three times. The sample was then dried in vacuum at 60 °C for 3 h for characterization.

The morphology and microstructure of the synthesized sample were characterized by a scanning electron microscopy (SEM, Hitachi S4800) equipped with an energy-dispersive X-ray spectrometer (EDX). X-ray diffraction (XRD) patterns were collected on a Rigaku Dmax-2500 X-Ray Diffractometer with Cu Ka radiation ( $\lambda = 0.15406$  nm). Transmission electron microscopy (TEM) images, high-resolution TEM (HRTEM) images were recorded on a JEOL 2010 electron microscope with an accelerating voltage of 200 kV.

Electrochemical measurements were performed in a conventional three-electrode electrochemical

cell. The sulfurized Ni foam (1 cm x 1 cm) was directly used as a working electrode. A platinum electrode and a saturated calomel electrode (SCE) were used as counter and reference electrodes, respectively. All potentials were referred to the reference electrode and all electrochemical measurements were performed at room temperature in 2 M aqueous KOH solution. The electrochemical performance of the samples was evaluated on a CHI 660D (Cheng Hua, Shang Hai) workstation for cyclic voltammetry (CV) and chronopotentiometry (CP) tests.

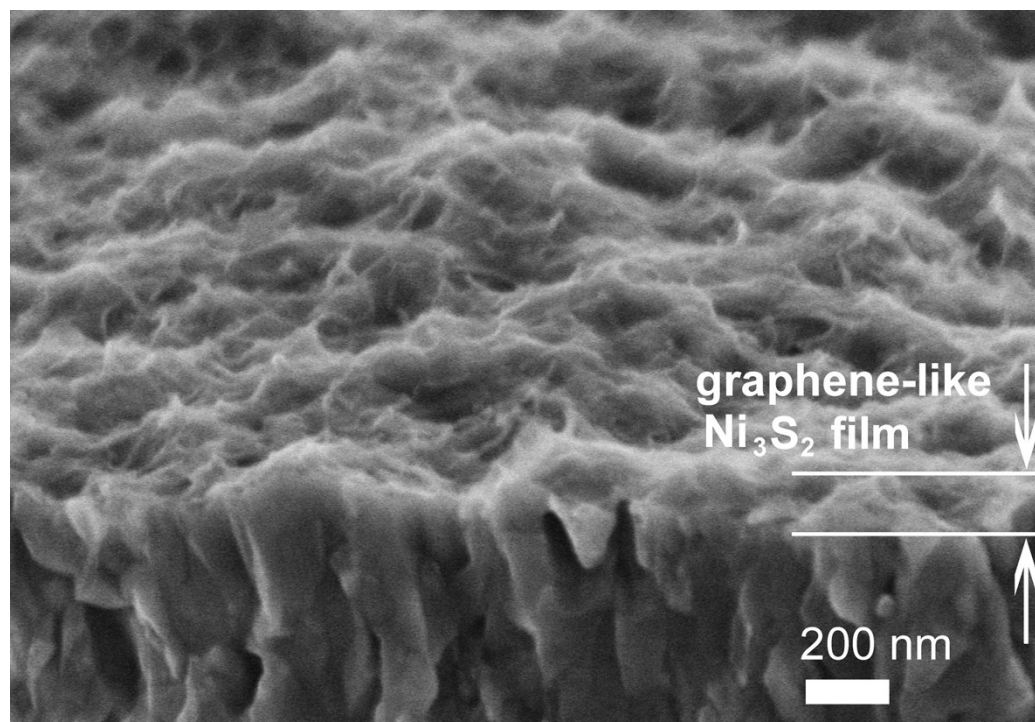

**Figure S1.** the section image of the as-prepared NSNF. From the figure, the thickness of the graphene-like film is about 100 ~200 nm.

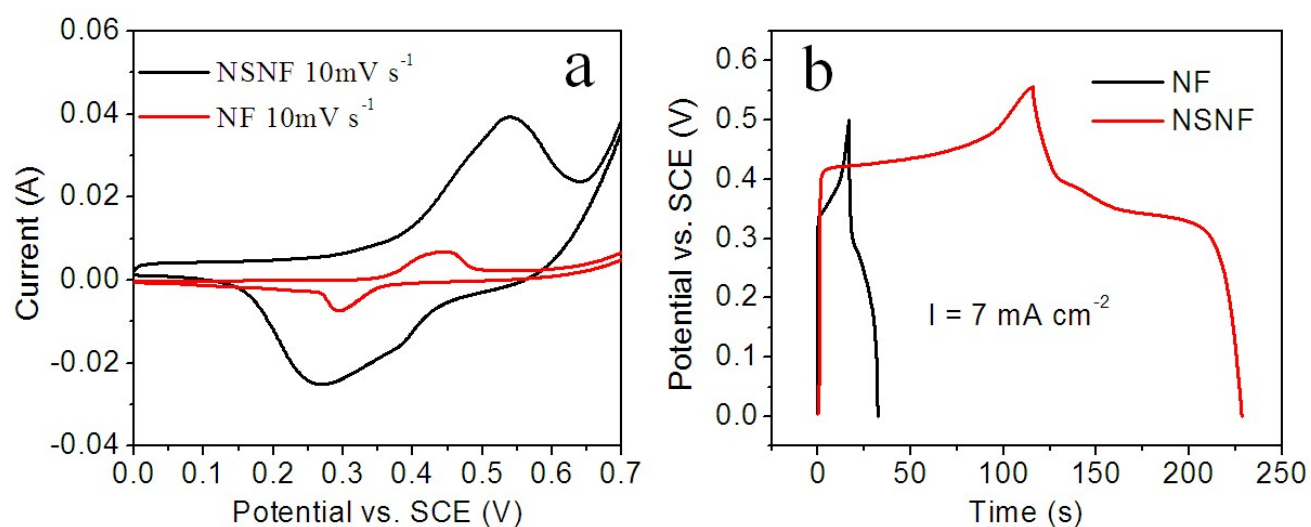

**Figure S2.** Electrochemical comparison of NF and NSNF: (a) CVs at 10 mV s<sup>-1</sup>; (b) Charge/discharge curves at 7 mA cm<sup>-2</sup>.

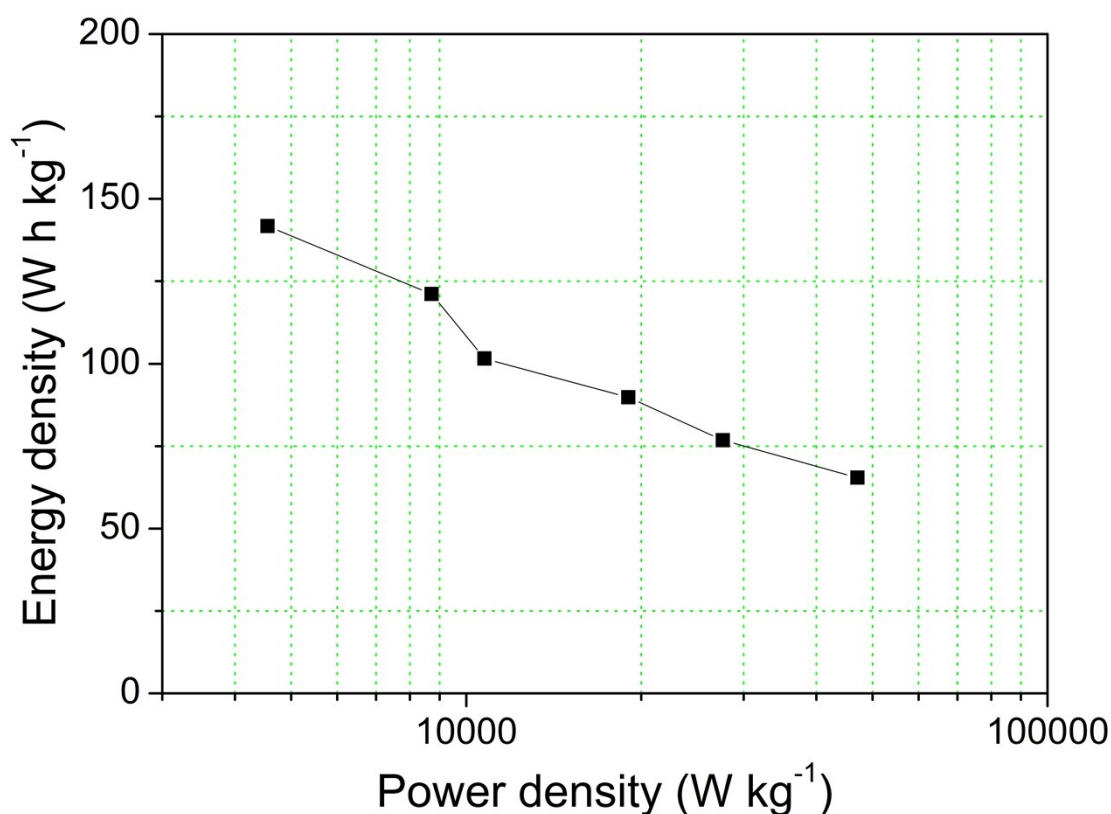

**Figure S3.** Ragone plot (power density vs. energy density) of the NSNF at various charge/discharge rates. The power density and energy density are calculated from the following equations, respectively.

$E = 1/2 C * \Delta V^2$   $P = E/t$  Where  $E$  (W h kg<sup>-1</sup>),  $C$  (F g<sup>-1</sup>),  $\Delta V$  (V),  $P$  (W kg<sup>-1</sup>), and  $t$  (h) are the energy density, specific capacitance, potential window of discharge, power density, and discharge time, respectively. When the power density is 47.11, 27.64, 19.01, 10.75, 8.72 and 4.55 kW kg<sup>-1</sup>, the NSNF electrode delivers an energy density values 65.43, 76.80, 89.79, 101.53, 121.12 and 141.69 Wh kg<sup>-1</sup> at current densities of 7, 15, 25, 35, 50 and 70 mA cm<sup>-2</sup>, respectively.
